# Supplementary material
Source: PubMed Central journal article supplement (PMC4790670)

Panel A: Results of survey of 100 clinicians choosing clinically meaningful difference for reduction in itching (median 30 mm, 95 CI 15 to 50 mm)

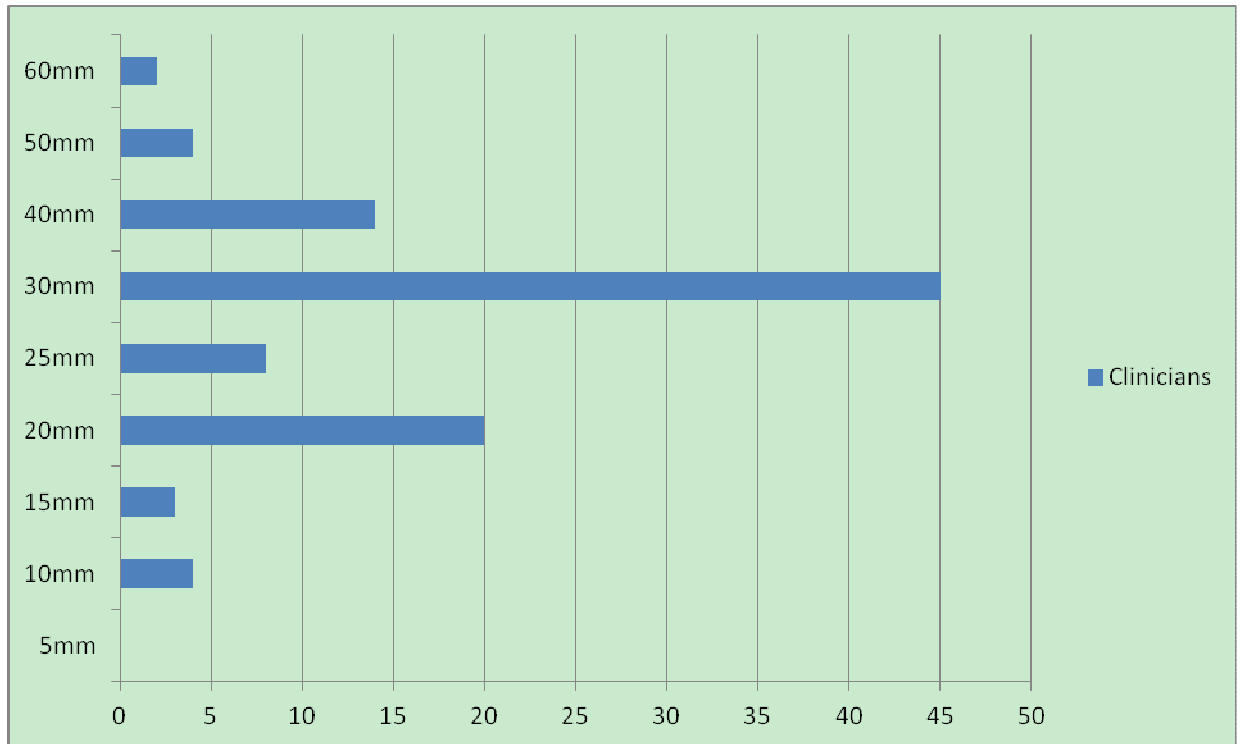

Panel B: Results of survey of 100 women choosing clinically meaningful difference for reduction in itching (median 30 mm, 95% CI 10 to 60)

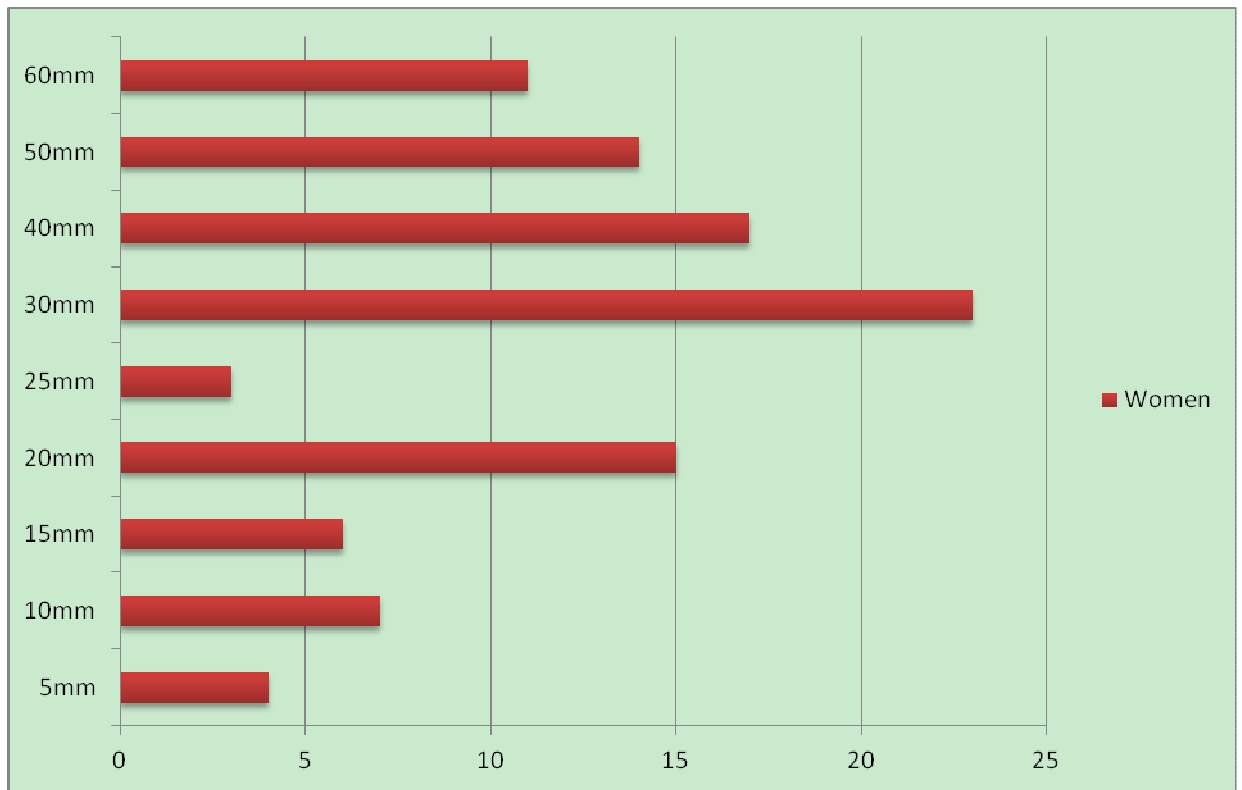

Supplement: chal002160.wf1_default.pdf [file chal002160.wf1_default.pdf]
