# Supplementary material
Source: PubMed Central journal article supplement (PMC4790670)
Supplement: chal002160.ww2_default.pdf [file chal002160.ww2_default.pdf]

## The PITCH Study Consortium

Recruiting centres: City Hospital, Nottingham: Karen Barker, Fiona Broughton Pipkin, Jo Fisher, Jo Gower, Vinita Gurung\*, Fiona Holloway, Asanka Jayawardene, James G Thornton; City Hospital, Sunderland: Amanda Bargh, Helen Cameron, Kim Hinshaw, Eileen Walton; Good Hope Hospital, Sutton Coldfield: Maxine Abukhalil, Karen Davey, Elizabeth Howland, Alison Porteous; Heartlands Hospital, Birmingham: Katherine Barber, Michele Madden, Neil Shah; Kingsmill Hospital, Mansfield: Karen Glass, Banchita Sahu, Zoey Spendlove; Queen Charlotte's Hospital, London: Jenny Chambers, Elaine Palmer, Catherine Williamson; Queens Medical Centre, Nottingham: George Bugg, Yvette Davis, Ruta Deshpande; St Mary's Paddington, London: Suzan Jeffries, Tom Prior, Tg Teoh; Guy's and St Thomas' Hospital, London: Annette Briley, Jenny Carter, Lucy C Chappell\*, Catherine Nelson-Piercy

Nottingham Trials Unit: Veronica Moroz, Daniel Simpkins, Paul Silcocks, Diane Whitham; Drug and placebo supply: Dr Riadh Jazrawi, Dr. Falk Pharma UK Ltd; Trial Steering Committee independent members: Dr Stephen Lindow (Chair), Hull and East Yorkshire Women and Children's Hospital, Dr David Williams, University College London, Ms Judith Hibbert, London; Data Monitoring and Ethics Committee: Dr Andrew Weeks (Chair) Liverpool Women's Hospital, the late Dr Edmund S Howarth, University Hospitals of Leicester (original chair), Dr Bryan Gill, Leeds General Infirmary, Dr Brad Manktelow University of Leicester

\*Joint first authors of "Ursodeoxycholic acid versus placebo, and early term delivery versus expectant management, in women with intrahepatic cholestasis of pregnancy: a semi-factorial randomised clinical trial"
